# Supplementary material
Source: Springer Nature journal article supplement (https://www.springermedizin.de/resource/supplementary/13054_2010_8590_MOESM2_ESM.pdf/9732312)

**(a)**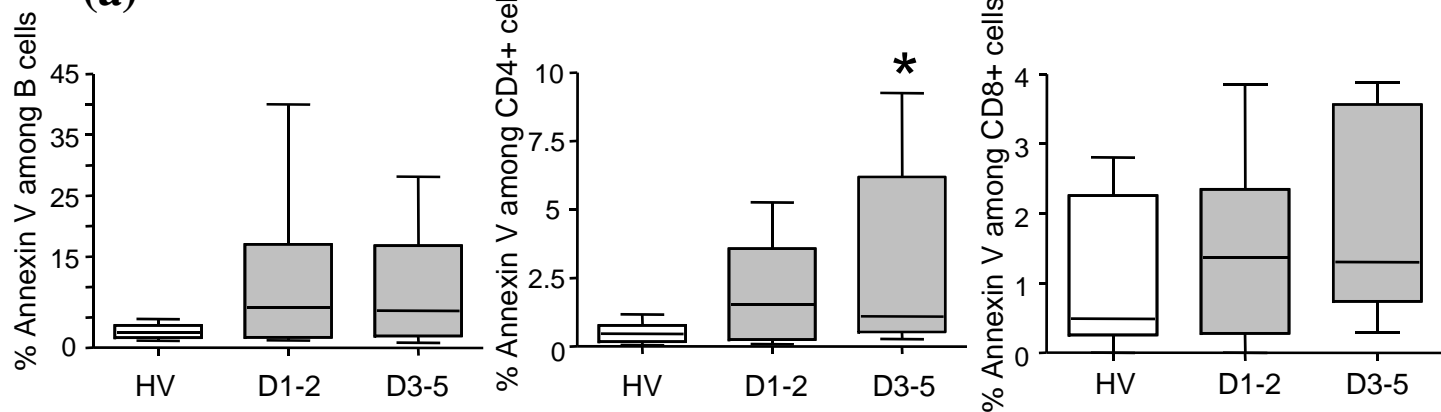**(b)**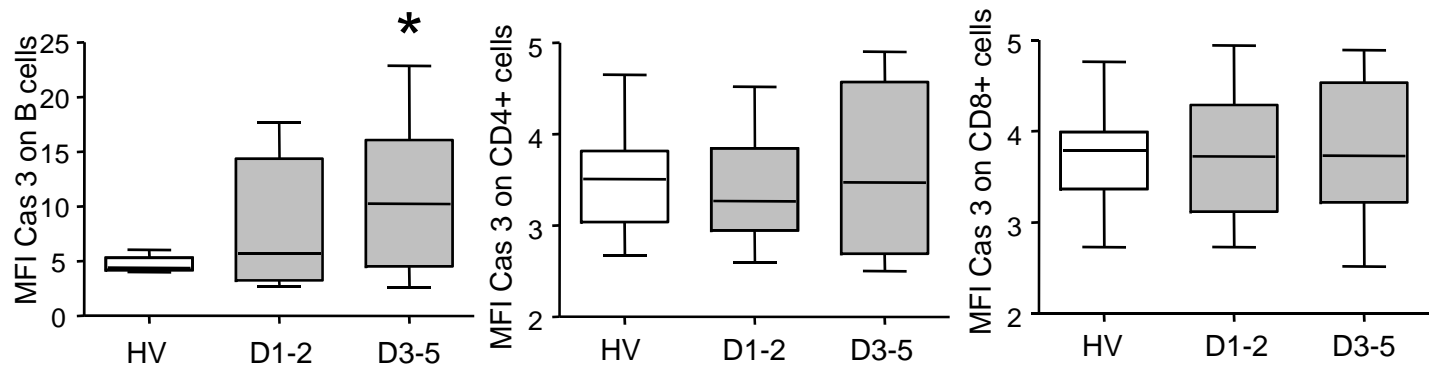**(c)**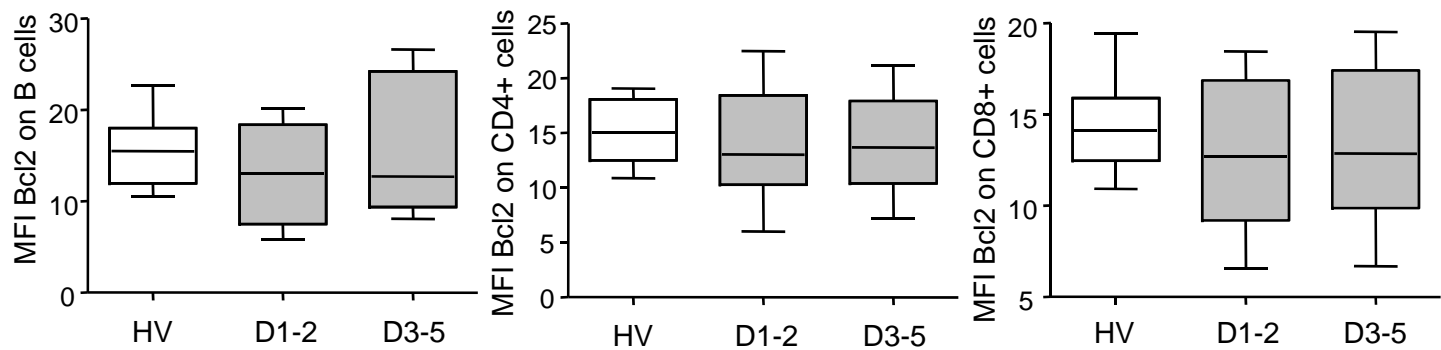

Supplement: MOESM2 [file 9732312]
